# Supplementary material for: Use of Biostimulants: Towards Sustainable Approach to Enhance Durum Wheat Performances
Source: MDPI journal article supplement (doi:10.3390/plants11010133), 2022-01-04
Supplement: s1 [file s1]

**Supplementary Materials**

**Table S1.** Correlation of the seed germination traits with the first two discriminant axes of PCA.

| Traits | PC1   | PC2    |
|--------|-------|--------|
| RL     | 0.601 | -0.260 |
| CL     | 0.544 | 0.825  |
| GR     | 0.585 | -0.502 |

GR: germination rate; CL: coleoptile length; RL: radicle length.

**Table S2.** Correlation of the physiological and agro-morphological traits obtained under pot conditions with the first two discriminant axes of PCA.

| <b>Traits</b>          | <b>PC1</b> | <b>PC2</b> |
|------------------------|------------|------------|
| Seed N S <sup>-1</sup> | 0.363      | 0.561      |
| LA                     | 0.368      | -0.656     |
| B plant <sup>-1</sup>  | 0.383      | -0.162     |
| GY plant <sup>-1</sup> | 0.389      | -0.204     |
| TKW                    | 0.387      | 0.232      |
| Chl                    | 0.373      | -0.113     |
| RWC                    | 0.381      | 0.347      |

RWC: relative water content; Chl: chlorophyll content; LA: leaf area; B plant<sup>-1</sup>: biomass per plant; Seed N S<sup>-1</sup>: seed number per spike, TKW: thousand kernel weight; GY plant<sup>-1</sup>: grain yield per plant.

**Table S3.** Correlation of the agro-morphological traits obtained under field conditions with the first two discriminant axes of PCA.

| <b>Traits</b>          | <b>PC1</b> | <b>PC2</b> |
|------------------------|------------|------------|
| GY plant <sup>-1</sup> | 0.504      | -0.355     |
| B plant <sup>-1</sup>  | 0.524      | -0.408     |
| TKW                    | 0.527      | 0.045      |
| PH                     | 0.440      | 0.839      |

PH: plant height; B plant<sup>-1</sup>: biomass per plant; TKW: thousand weight kernel; GY plant<sup>-1</sup>: grain yield per plant.

**Table S4.** Correlation of the physiological and agro-morphological traits obtained under field conditions with the first two discriminant axes of PCA.

| <b>Traits</b>         | <b>PC1</b> | <b>PC2</b> |
|-----------------------|------------|------------|
| Seed WS <sup>-1</sup> | 0.447      | -0.070     |
| GY plot <sup>-1</sup> | 0.403      | -0.197     |
| TKW                   | 0.434      | 0.236      |
| Chl                   | 0.433      | 0.193      |
| B plot <sup>-1</sup>  | 0.393      | 0.474      |
| SN plot <sup>-1</sup> | 0.327      | -0.800     |

Chl: chlorophyll content; B plot<sup>-1</sup>: biomass per plot; SN plot<sup>-1</sup>: spike number per plot; Seed WS<sup>-1</sup>: seed weight per spike; TKW: thousand kernel weight; GY plot<sup>-1</sup>: grain yield per plot.

**Table S5.** Main characteristic of used durum wheat cultivars.

| Name  | Origin           |          |     | Main characteristics                                                            |
|-------|------------------|----------|-----|---------------------------------------------------------------------------------|
| Karim | Cross            | made     | at  | Semi-early cultivar                                                             |
|       | CIMMYT/Mexico    |          | and | Productive cultivar                                                             |
|       | released in 1980 |          |     | Susceptible to leaf rust and septoria diseases                                  |
|       |                  |          |     | Specific weight: 78-82 kg hl <sup>-1</sup>                                      |
|       |                  |          |     | Thousand kernel weight: 40-45 g                                                 |
|       |                  |          |     | Proteins: 11-15%                                                                |
| Maali | Local            | crossing | and | Early cultivar                                                                  |
|       | released in 2007 |          |     | Very productive (25% more than Karim)                                           |
|       |                  |          |     | Resistant to powdery mildew, and moderately resistant to septoria and leaf rust |
|       |                  |          |     | Tolerant to drought                                                             |
|       |                  |          |     | Specific weight: 82-84 kg hl <sup>-1</sup>                                      |
|       |                  |          |     | Thousand kernel weight: 40-45 g                                                 |
|       |                  |          |     | Proteins: 12-15%                                                                |
| Salim | Local            | crossing | and | Early cultivar                                                                  |
|       | released in 2009 |          |     | Very productive cultivar                                                        |
|       |                  |          |     | Resistant to septoria, leaf rust, and to yellow rust                            |
|       |                  |          |     | Tolerant to drought                                                             |
|       |                  |          |     | Specific weight: 80-83 kg hl <sup>-1</sup>                                      |
|       |                  |          |     | Thousand kernel weight: 40-48 g                                                 |
|       |                  |          |     | Proteins: 12-13.5%                                                              |

**Table S6.** Mean precipitation (mm) and temperature (°C) in Boulifa/Kef site during 2016/17 cropping season.

| <b>Meteorological data</b> | <b>Oct</b> | <b>Nov</b> | <b>Dec</b> | <b>Jan</b> | <b>Feb</b> | <b>Mar</b> | <b>Apr</b> | <b>May</b> | <b>Jun</b> | <b>Jul</b> |
|----------------------------|------------|------------|------------|------------|------------|------------|------------|------------|------------|------------|
| Precipitation (mm)         | 11         | 43         | 51         | 32         | 24         | 2          | 40         | 2          | 37         | 15         |
| Temperature (°C)           | 20.75      | 14.3       | 10.05      | 6.65       | 12.5       | 12.3       | 16.95      | 21.15      | 26.5       | 28.35      |
